# Supplementary material for: The role of interface on the toughening and failure mechanisms of thermoplastic nanocomposites reinforced with nanofibrillated rubber
Source: Royal Society of Chemistry journal article supplement (doi:10.1039/d1nr07363j), 2021-01-01
Supplement: d1nr07363j1.pdf [file d1nr07363j1.pdf]

# The Role of Interface on the Toughening and Failure Mechanisms of Thermoplastic Nanocomposites Reinforced with Nanofibrillated Rubber

Mahdi Zeidi<sup>a</sup>, Chun Il Kim<sup>b\*</sup>, Chul B Park<sup>a\*</sup>

<sup>a</sup> Microcellular Plastics Manufacturing Laboratory, Department of Mechanical and Industrial Engineering, University of Toronto, 5 King's College Road, Toronto, ON, Canada, M5S 3G8.

<sup>b</sup> Department of Mechanical Engineering, University of Alberta, 9211 116 Street NW, Edmonton, AB, Canada, T6G 1H9.

\* Corresponding authors.

E-mail addresses: [m.zeidi@mail.utoronto.ca](mailto:m.zeidi@mail.utoronto.ca) (Mahdi Zeidi), [cikim@ualberta.ca](mailto:cikim@ualberta.ca) (Chun Il Kim), [park@mie.utoronto.ca](mailto:park@mie.utoronto.ca) (Chul B. Park)

Supplementary Information contents:

Number of pages: 9

Number of figures: 5

Number of tables: 4

- **Leonard-Jones Potential Parameters:**

Table S1 Leonard-Jones Potential Parameters.

| Pair    | $\sigma$ | $\epsilon$ |
|---------|----------|------------|
| c2,c2   | 0.11800  | 3.90500    |
| c3,c3   | 0.16000  | 3.91000    |
| c32,c32 | 0.16000  | 3.91000    |
| c7,c7   | 0.10500  | 3.75000    |
| c8,c8   | 0.11500  | 3.80000    |
| ch,ch   | 0.08000  | 3.85000    |

- **Force field parameters obtained from the quantum mechanics (QM) simulation:**

The bond and angle force field parameters were obtained by changing the atom separation distance and angle by a magnitude of 0.05 Å and 5°. All energy calculations were carried out by employing complete-active-space second-order perturbation theory (CASPT2/cc-pVTZ)<sup>1</sup>.

Table S2 Morse force field parameters (bonds).

| Bond   | $D$<br>(Kcal/mol) | $r_0$ (Å) | $\alpha$ | $\beta$ |
|--------|-------------------|-----------|----------|---------|
| c2,c2  | 95.11             | 1.526     | 1.87     | 0.008   |
| c2,c32 | 85.65             | 1.526     | 1.51     | 0.078   |
| c2,c7  | 115.12            | 1.500     | 1.33     | 0.004   |
| c2,ch  | 65.98             | 1.526     | 1.29     | 0.009   |
| c3,ch  | 74.32             | 1.526     | 1.97     | 0.075   |
| c32,c8 | 105.75            | 1.500     | 2.11     | 0.050   |
| c7,c8  | 121.09            | 1.340     | 2.05     | 0.039   |
| c7,ch  | 88.72             | 1.500     | 1.18     | 0.024   |
| ch,ch  | 59.31             | 1.526     | 1.54     | 0.064   |

Table S3 Anharmonic force field parameters (angles).

| Angle     | $\theta_0$<br>(degree) | $k_1$<br>(Kcal/mol/rad) | $k_2$<br>(Kcal/mol/rad <sup>2</sup> ) | $k_3$<br>(Kcal/mol/rad <sup>3</sup> ) | $k_4$<br>(Kcal/mol/rad <sup>4</sup> ) |
|-----------|------------------------|-------------------------|---------------------------------------|---------------------------------------|---------------------------------------|
| c2,c2,c2  | 112.400                | 0.00                    | 43.65                                 | -51.23                                | 0.01                                  |
| c2,c2,c32 | 112.400                | 0.001                   | 89.09                                 | -12.98                                | 0.01                                  |
| c2,c2,ch  | 112.400                | 0.00                    | 77.31                                 | -29.00                                | 0.00                                  |
| c2,c7,c8  | 112.700                | 0.00                    | 69.12                                 | -39.10                                | 0.00                                  |
| c2,c7,ch  | 112.700                | 0.00                    | 89.45                                 | -33.22                                | 0.02                                  |
| c2,ch,c2  | 112.400                | 0.00                    | 61.75                                 | -42.41                                | 0.00                                  |
| c2,ch,c3  | 112.400                | 0.00                    | -51.32                                | -74.89                                | 189.83                                |
| c2,ch,c7  | 112.700                | 0.001                   | 88.53                                 | -11.92                                | 0.00                                  |
| c2,ch,ch  | 111.500                | 0.00                    | 51.82                                 | -50.36                                | 0.00                                  |
| c3,ch,c3  | 111.500                | 0.00                    | 56.38                                 | -28.77                                | 0.00                                  |
| c3,ch,ch  | 111.500                | 0.002                   | 68.99                                 | -20.08                                | 0.04                                  |
| c32,c2,ch | 112.400                | 0.00                    | 81.11                                 | -15.22                                | 0.00                                  |
| c32,c8,c7 | 112.700                | 0.00                    | 42.32                                 | -31.32                                | 0.00                                  |
| c7,c2,ch  | 112.700                | 0.00                    | -32.10                                | -59.43                                | 211.75                                |
| c7,ch,ch  | 112.700                | 0.00                    | 49.96                                 | -14.13                                | 0.00                                  |
| c8,c7,ch  | 112.700                | 0.001                   | 63.52                                 | -21.11                                | 0.00                                  |
| ch,c2,ch  | 112.400                | 0.00                    | 77.57                                 | -18.12                                | 0.01                                  |
| ch,ch,ch  | 111.500                | 0.00                    | -39.91                                | -61.64                                | 108.14                                |

- **Simulation protocol of the EPDM nanofiber formation:**

In Table S3, the detailed description of the four-step MD simulation protocol of the crosslinked-annealed-melt-drawn EPDM nanofiber formation is presented.

Table S4 Nanofiber formation four-step Methodology

| <b>Step 1: Bulk-state equilibrium and energy minimization</b>                                                   |                 |               |                                |
|-----------------------------------------------------------------------------------------------------------------|-----------------|---------------|--------------------------------|
| Ensemble                                                                                                        | Temperature (K) | Duration (ns) | Pressure (bar)                 |
| NEV/limit                                                                                                       |                 | 1             |                                |
| NPT                                                                                                             | 150             | 4             | 0                              |
| NPT                                                                                                             | 150 to 1000     | 4             | 0                              |
| NPT                                                                                                             | 1000 to 800     | 4             | 0                              |
| NPT                                                                                                             | 800             | 4             | 0 to 1013.25 in all-directions |
| NPT                                                                                                             | 800             | 4             | 1013.25 to 0 in all-directions |
| NPT                                                                                                             | 800 to 150      | 10            | 0                              |
| NPT                                                                                                             | 150 to 800      | 10            | 0                              |
| NPT                                                                                                             | 800 to 150      | 4             | 0                              |
| <b>Step 2: Free-surface formation</b>                                                                           |                 |               |                                |
| NVT                                                                                                             | 150 to 800      | 4             |                                |
| NPT                                                                                                             | 800             | 10            | 0 in z-direction               |
| NPT                                                                                                             | 800 to 150      | 4             | 0 in z-direction               |
| NPT                                                                                                             | 150             | 4             | 0 in z-direction               |
| <b>Step 3: Melt-drawing and employing cylindrical confinement</b>                                               |                 |               |                                |
| NPT                                                                                                             | 150 to 800      | 4             | 0 in z-direction               |
| A linear increased force is applied in the z-direction and the system is confined.                              |                 |               |                                |
| NPT                                                                                                             | 800 to 800      | 4             | 0 in z-direction               |
| NVT                                                                                                             | 800 to 150      | 4             |                                |
| NPT                                                                                                             | 150             | 4             | 0 in z-direction               |
| <b>Step 4: Crosslinking and Annealing</b>                                                                       |                 |               |                                |
| NPT                                                                                                             | 150 to 800      | 4             | 0 in z-direction               |
| Reactive simulation is performed for crosslinking (50ns)                                                        |                 |               |                                |
| NVT                                                                                                             | 800 to 150      | 4             |                                |
| NPT                                                                                                             | 150             | 4             | 0 in z-direction               |
| The generated nanofiber is then embedded inside the PP matrix and the pull-out and tensile tests are performed. |                 |               |                                |

- **Nanostructure characterization of EPDM at the bulk-state:**

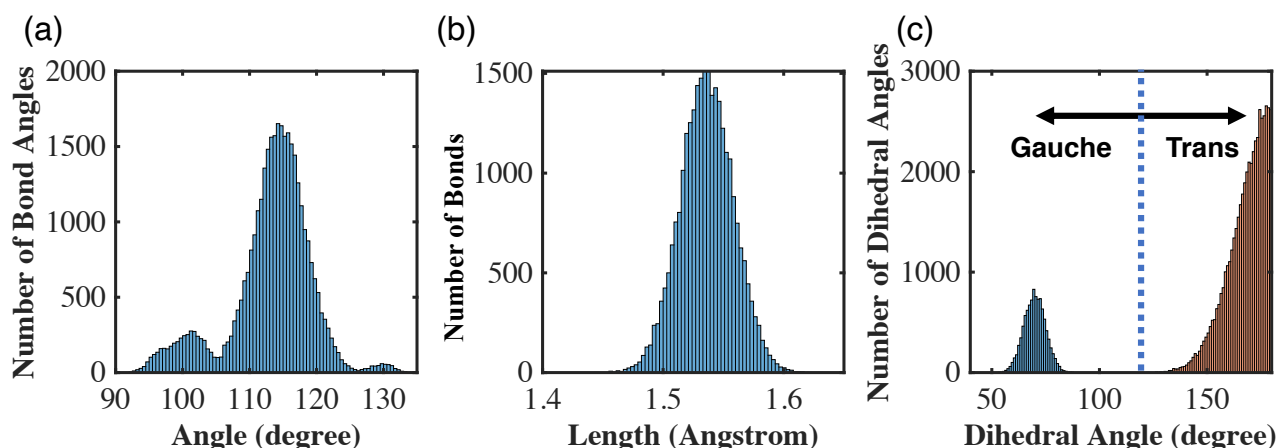

Figure S1 The (a) bond length, (b) bond angle, and (c) dihedral angle distributions for the EPDM at bulk-state after equilibrating the system at 150K.

- **Effect of the melt-drawing process on the polymeric chain orientation:**

The results presented in this section reveal the structural revolution and corresponding abrupt change in mechanical properties (i.e., size dependency) of nanofibers prepared with melt drawing via applied axial force. To investigate the effect of the axial force, two kinds of nanofibers were prepared: with and without applying the axial force (see, Section 2 in paper). In Figure S2a, the effect of axial force on the radius of gyration of one single EPDM polymeric chain was illustrated. As expected, the chain tends to re-orient and align in the direction of axial force (z-axis). In Figure S2b, representative snapshots of the final atomic structures of EPDM nanofibers at different drawing ratios were illustrated. The drawing ratio can be controlled by whether the axial force magnitude or the simulation time. In Figure S2c, comparative snapshots of EPDM nanofibers prepared by both methods are displayed: Figure S2a-left: without axial force and Figure S2a-right: with axial force. Without applying the axial force, polymeric chains are randomly orientated and distributed in the system and the nanofiber is in an amorphous state. However, by applying the axial force (melt-drawing), it was observed that the EPDM chains are well-ordered along the nanofiber's axis. In Figure S2e, the chain orientation parameter ( $P_{2z}$ ) was monitored at different drawing ratio nanofiber (see Figure S2d for  $P_{2z}$  equation). As the drawing ratio increases, the polymeric chains show a tendency to realign in the z-direction. The changes in mechanical properties were also demonstrated in Figs. S3 and S4.

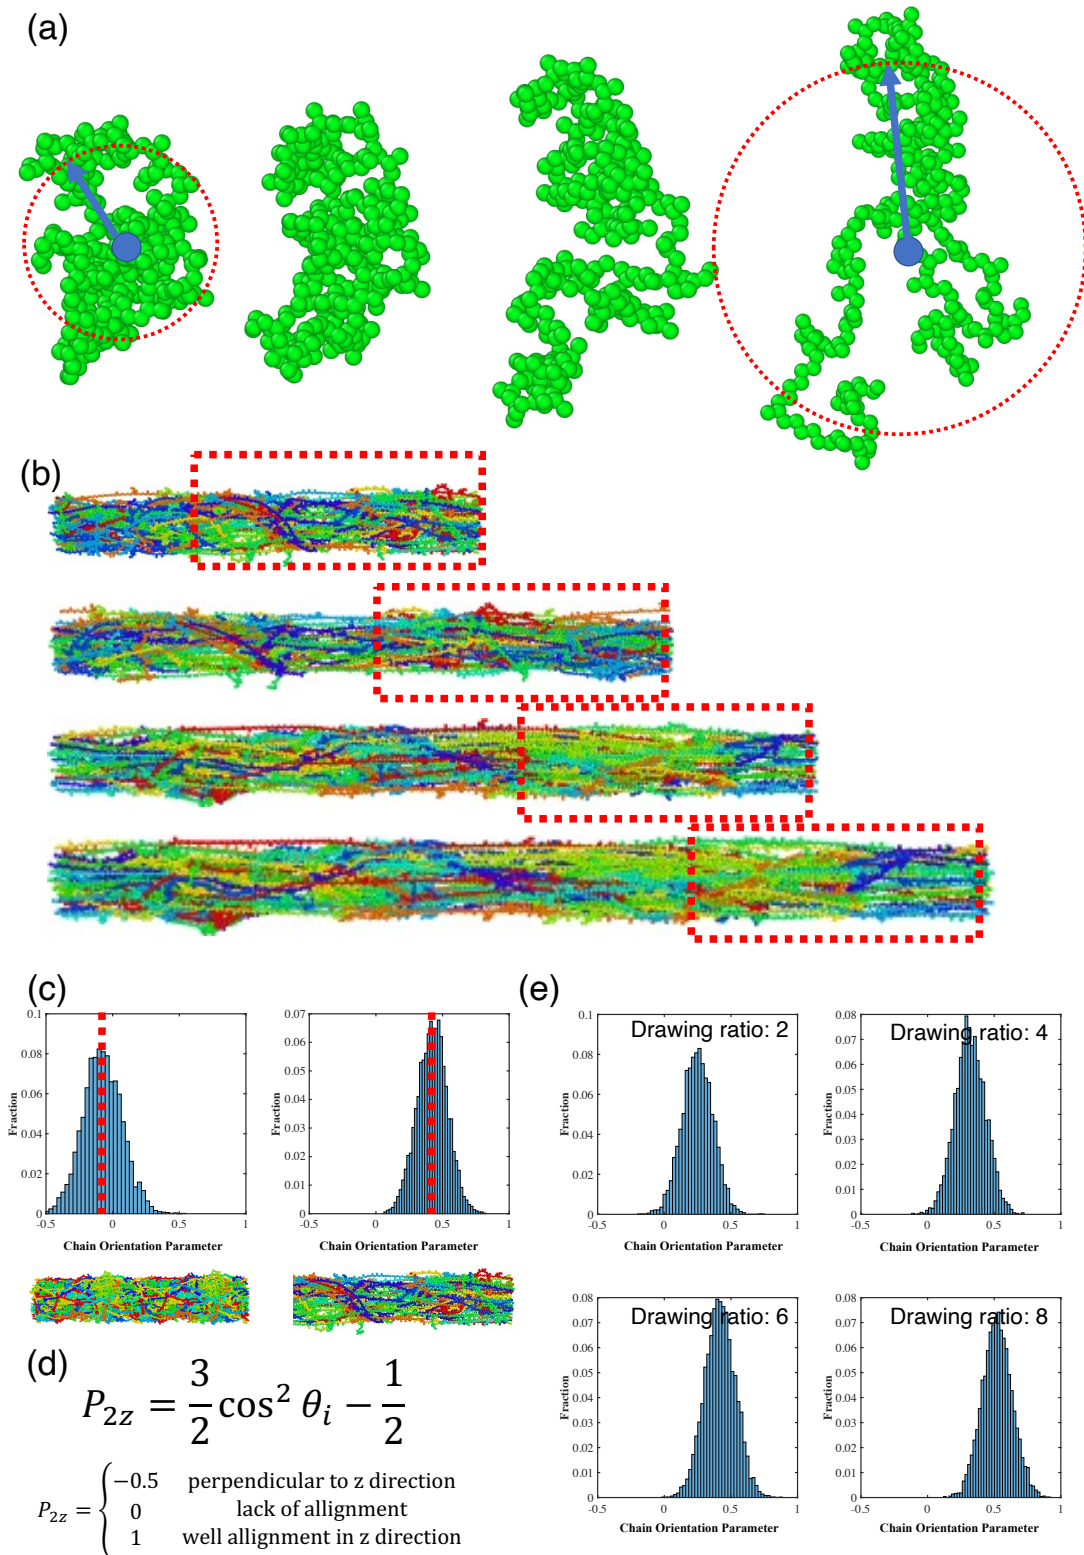

Figure S2 (a) Snapshot of an individual EPDM chain for various strain, the chains were realigned in the direction of applied load, (b) snapshot of the generated EPDM nanofiber at different drawing ratio, (c) the distribution of the chain orientation parameter ( $P_{2z}$ ) and representative snapshots of the EPDM nanofibers with and without melt-drawing, (d) the relation of the chain orientation parameter ( $P_{2z}$ ) of nanofiber:  $P_{2z} = -0.5$ ,  $P_{2z} = 0$  and  $P_{2z} = 1$  refer to perpendicular to the z-direction, no significant alignment and well-alignment in the z-direction, respectively<sup>2,3</sup>, and (e) monitoring of the chain orientation parameter of the nanofibers at different drawing ratios. As the drawing ratio increases, the polymeric chains tend to realign in the z-direction.

- **Effect of the molecular weight on the mechanical properties of the EPDM nanofiber:**

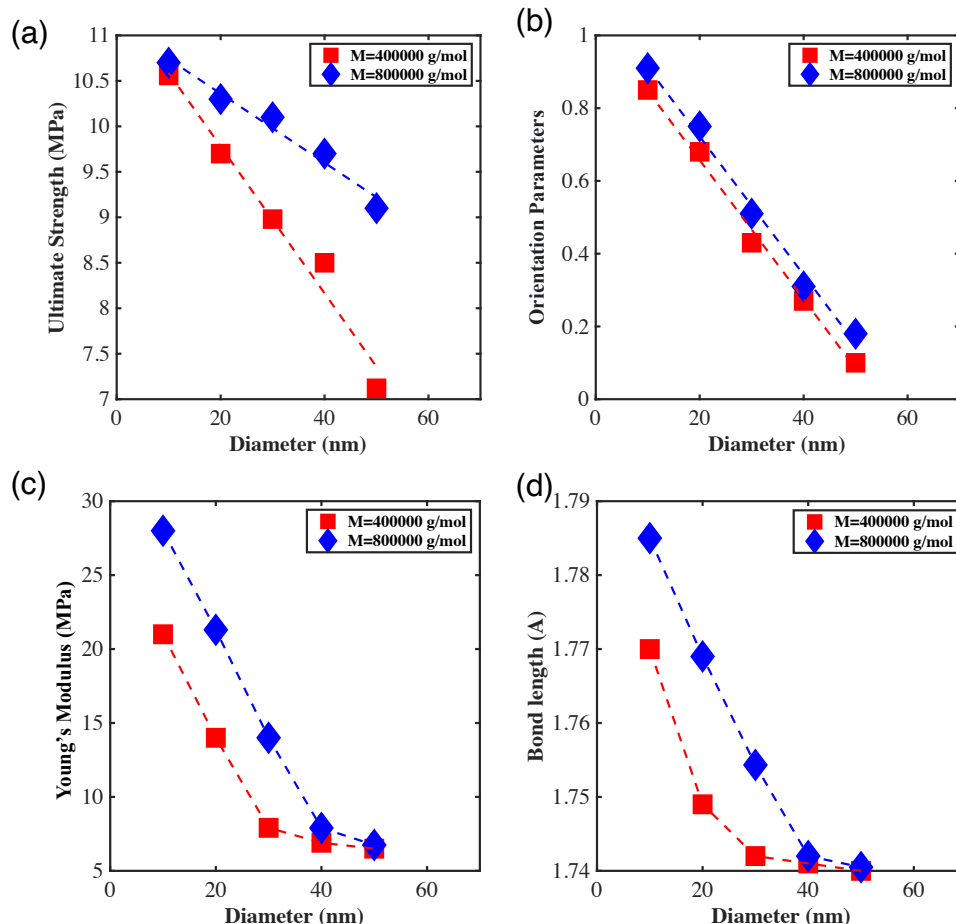

Figure S3 Correlation of (a) EPDM nanofiber diameter vs ultimate tensile strength for different molecular weight (MW) (MW = 400000 g/mol and MW = 800000 g/mol), (b) corresponding nanofiber diameter vs chain orientation parameter, (c) corresponding nanofiber diameter vs. Young's modulus, and (d) corresponding diameter vs. the average length of bonds along the EPDM backbone.

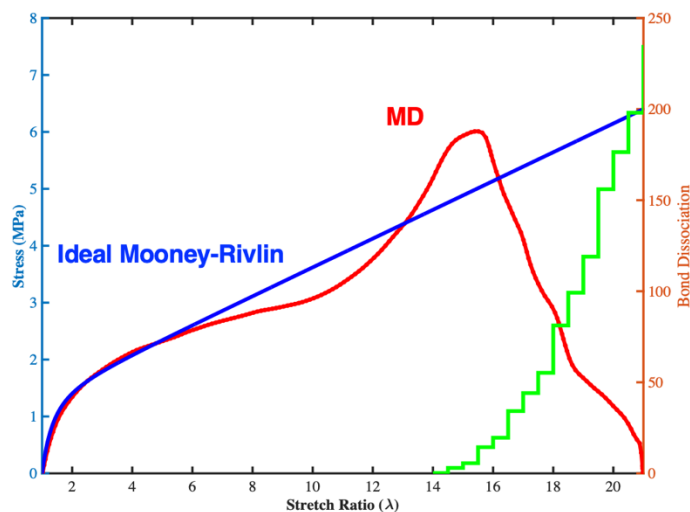

Figure S4 Mechanical behaviour of EPDM nanofiber and the number of covalent bond dissociations calculated from MD simulation.

- **Comparison between mechanical properties and evolution of the potential energies of the annealed and amorphous nanofibers:**

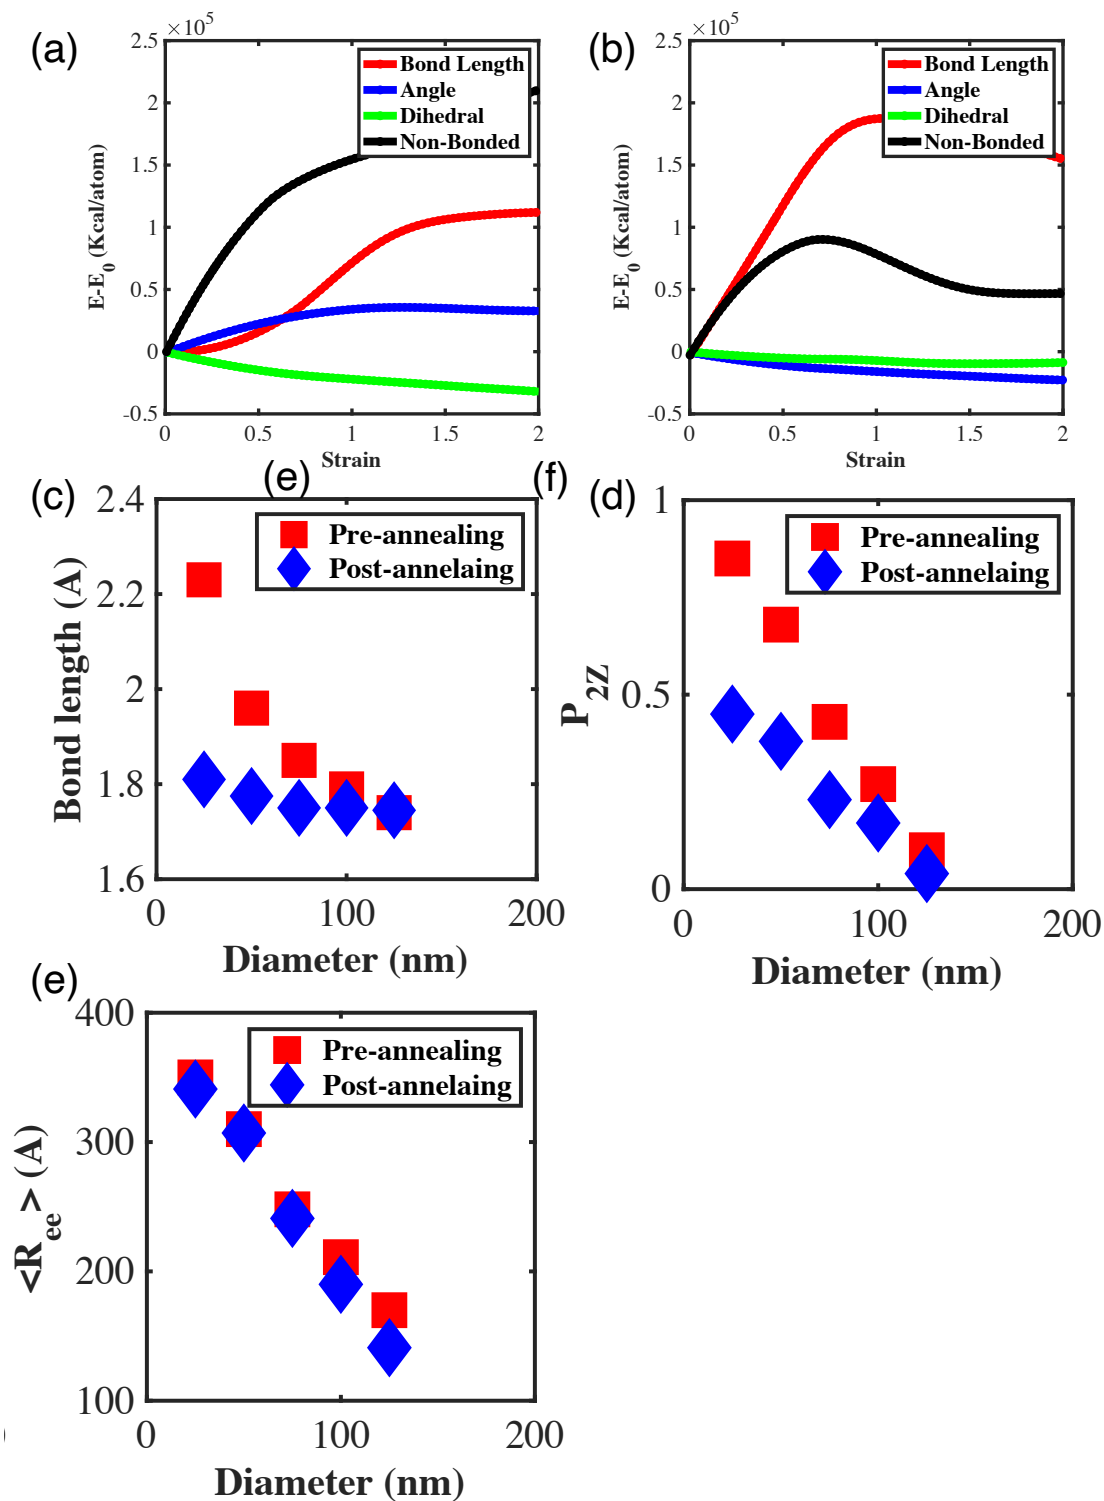

Figure S5 Evolution of the bond, angle, dihedral, and non-bonded energies during the tensile test for: (a) amorphous nanofiber, and (b) annealed nanofiber. Corresponding (c) bond length, (d) chain orientation parameter, and (e) backbone end-to-end distance extracted from the amorphous and the annealed nanofiber.



## References

1. Vancoillie, S. et al. Parallelization of a multiconfigurational perturbation theory. *J. Comput. Chem.* **34**, 1937–1948 (2013).
2. Deng, S., Arinstein, A. & Zussman, E. Size-dependent mechanical properties of glassy polymer nanofibers via molecular dynamics simulations. *J. Polym. Sci. Part B Polym. Phys.* **55**, 506–514 (2017).
3. Hossain, D. et al. Molecular dynamics simulations of deformation mechanisms of amorphous polyethylene. *Polymer (Guildf)*. **51**, 6071–6083 (2010).
